# Supplementary material for: Dual function of molybdenum sulfide/C-cloth in enhancing the performance of fullerene nanosheets based solar cell and supercapacitor
Source: Royal Society of Chemistry journal article supplement (doi:10.1039/c8ra04956d), 2018-01-01
Supplement: c8ra04956d1.pdf [file c8ra04956d1.pdf]

## Supporting Information

### Dual Function of Molybdenum Sulfide/C-cloth in Enhancing the Performance of Fullerene Nanosheets based Solar cell and Supercapacitor

Aparajita Das,<sup>a</sup> Melepurath Deepa,<sup>a,\*</sup> Partha Ghosal<sup>b</sup>

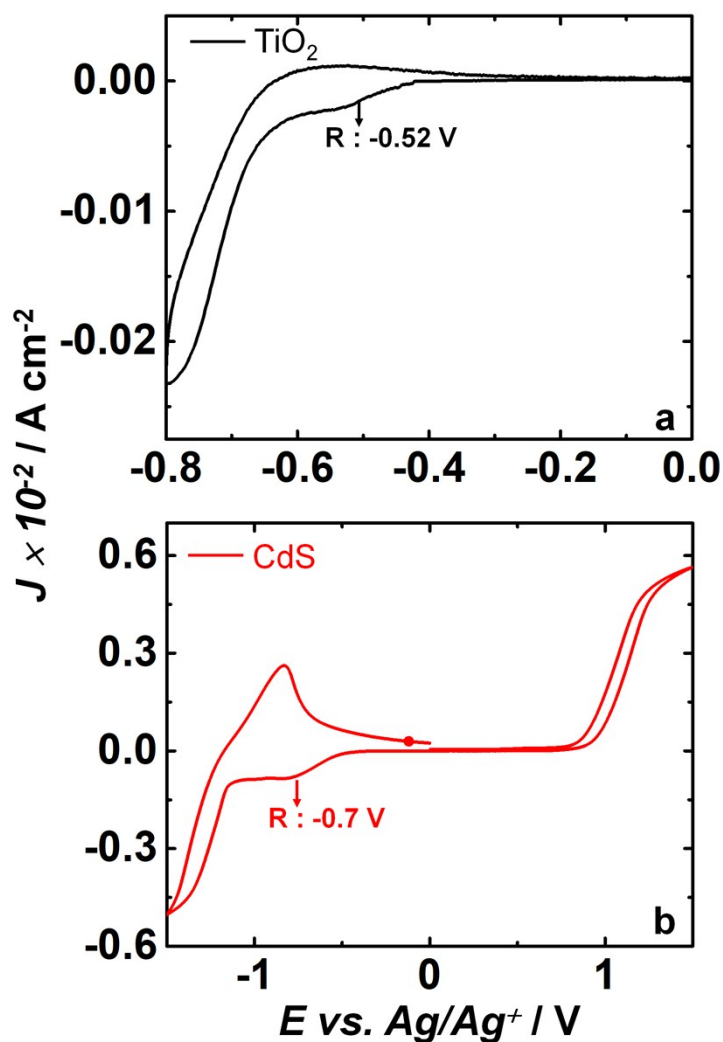

Figure S1. Cyclic voltammograms of (a) TiO<sub>2</sub>/FTO and (b) CdS/FTO recorded in a 0.1 M KOH solution at a scan rate of 10 mV s<sup>-1</sup> and used as working electrode in three electrode electrochemical cells. Ag/AgCl/KCl is used as reference electrode and a Pt rod as the counter electrode.

The CV plots of TiO<sub>2</sub> and CdS shows a reduction potential peaks at -0.52 V and -0.7 V (verses Ag/AgCl/KCl) in their cathodic sweep. The potential of Ag/AgCl/KCl (verses NHE) is 0.197 V. The reduction potential of TiO<sub>2</sub> (verses NHE) is  $E_{\text{Red}}^0 = (-0.52 + 0.197) \text{ V} = -0.323 \text{ V}$  and reduction potential of CdS (verses NHE)  $E_{\text{Red}}^0 = (-0.7 + 0.197) \text{ V} = -0.503 \text{ V}$ . Therefore, the conduction band (CB) or LUMO of TiO<sub>2</sub> (w.r.t vacuum level) is calculated to be  $E_{\text{Red}} (\text{eV}) = -4.5 - (-0.323) = -4.17 \text{ eV}$  and for CdS it is  $E_{\text{Red}} (\text{eV}) = -4.5 - (-0.503) = -4 \text{ eV}$  respectively. By subtracting the optical band gap energy ( $E_g$ ) from CB, the valence

band energy (VB) or HOMO of TiO<sub>2</sub> is found to be  $(-4.17 - 3.19) = -7.36$  eV and for CdS it is found to be  $(-4 - 2.25) = -6.25$  eV. These values are used in energy band diagram shown in figure 3e.

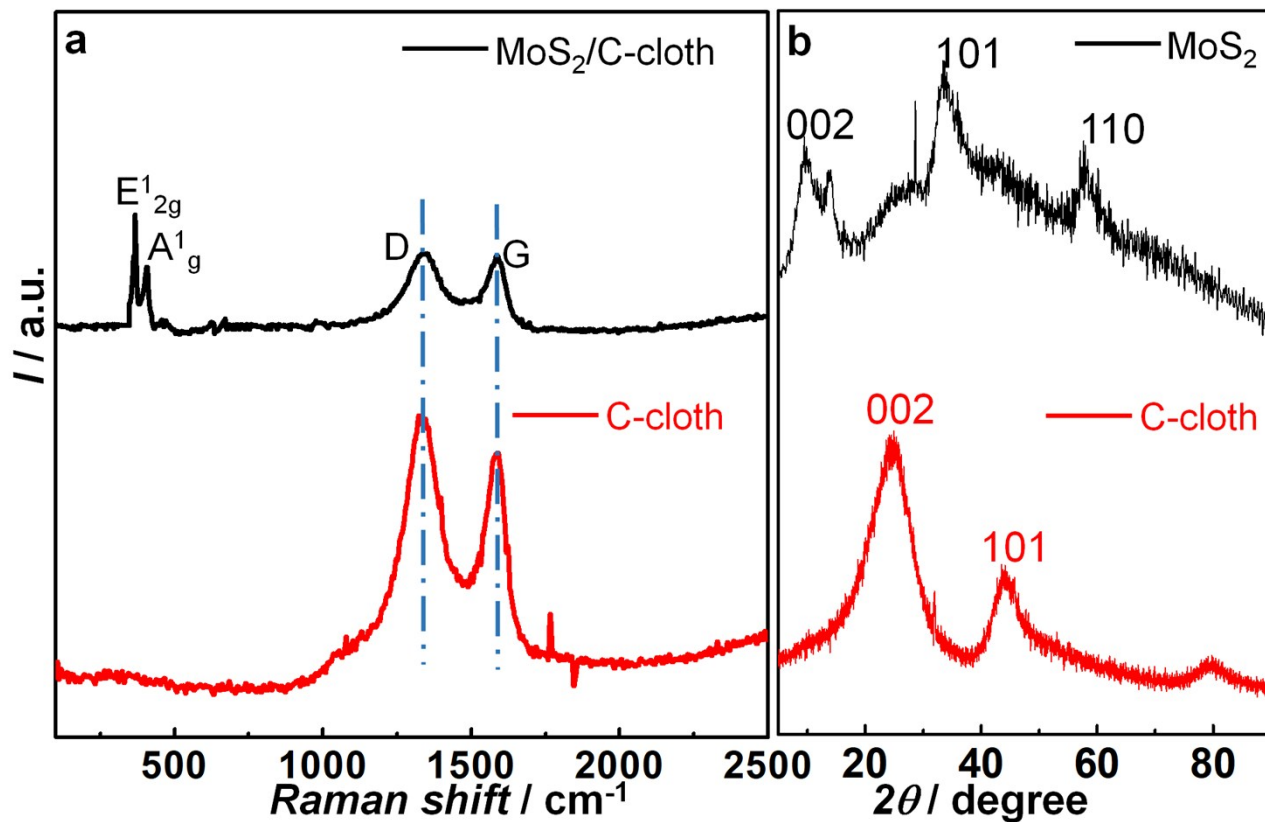

Figure S2. Raman spectra of C-cloth and MoS<sub>2</sub>/C-cloth and (b) XRD patterns of C-cloth and MoS<sub>2</sub>.

Table S1. Emission decay fitting parameters of photoactive films.

| Sample                                    | B <sub>1</sub> | τ <sub>1</sub> (ns) | B <sub>2</sub> | τ <sub>2</sub> (ns) | τ (ns) | χ <sup>2</sup> |
|-------------------------------------------|----------------|---------------------|----------------|---------------------|--------|----------------|
| Glass/CdS                                 | 99.3           | 0.007               | 0.7            | 18.1                | 17.07  | 1.9            |
| FTO/CdS                                   | 41.32          | 13.1                | 58.68          | 0.084               | 12.98  | 0.96           |
| TiO <sub>2</sub> /CdS                     | 63.98          | 0.218               | 36.02          | 7.12                | 6.764  | 1.03           |
| TiO <sub>2</sub> /C <sub>60</sub> -B/CdS  | 81.82          | 0.074               | 18.18          | 1.65                | 1.385  | 1.04           |
| TiO <sub>2</sub> /C <sub>60</sub> -NS/CdS | 10.99          | 0.003               | 89.01          | 0.65                | 0.65   | 1.27           |

Table S2. Raman data of counter electrodes.

| Counter electrode         | D-band (cm <sup>-1</sup> ) | G-band (cm <sup>-1</sup> ) | I <sub>D</sub> /I <sub>G</sub> |
|---------------------------|----------------------------|----------------------------|--------------------------------|
| C-cloth                   | 1335                       | 1584                       | 1.16                           |
| MoS <sub>2</sub> /C-cloth | 1339                       | 1586                       | 1.025                          |

| Counter                   | $R_s$ ( $\Omega$ ) | $R_{CT}$ ( $\Omega$ ) | $R_{gb}$ ( $\Omega$ ) |
|---------------------------|--------------------|-----------------------|-----------------------|
| C-cloth                   | 20.1               | 4                     | 14.2                  |
| MoS <sub>2</sub> /C-cloth | 23.6               | 1.4                   | 19.2                  |

Table S3. EIS parameters for counter electrode based cells in symmetric configurations.

Table S4. Solar cell parameters of large area QDSCs (1 cm<sup>2</sup>) containing 1 M Na<sub>2</sub>S + 1 M S polysulfide based gel electrolyte under 1 sun illumination (AM 1.5, 100 mW cm<sup>-2</sup>).

| Photoanode                                | MoS <sub>2</sub> /C-cloth       |               |      |            |
|-------------------------------------------|---------------------------------|---------------|------|------------|
|                                           | $J_{sc}$ (mA cm <sup>-2</sup> ) | $V_{oc}$ (mV) | FF   | $\eta$ (%) |
| TiO <sub>2</sub> /CdS                     |                                 |               |      |            |
| 1                                         | 5.9                             | 675           | 0.49 | 2          |
| 2                                         | 5.95                            | 680.4         | 0.49 | 2          |
| TiO <sub>2</sub> /C <sub>60</sub> -B/CdS  |                                 |               |      |            |
| 1                                         | 7.2                             | 692.2         | 0.50 | 2.5        |
| 2                                         | 7.1                             | 709           | 0.47 | 2.4        |
| TiO <sub>2</sub> /C <sub>60</sub> -NS/CdS |                                 |               |      |            |
| 1                                         | 8                               | 717.3         | 0.51 | 2.9        |
| 2                                         | 8.2                             | 719.1         | 0.50 | 3          |

Table S5. Solar cell parameters of TiO<sub>2</sub>/C<sub>60</sub>-NS/CdS cell with MoS<sub>2</sub>/C-cloth counter in polysulfide gel electrolyte under 1 sun illumination at different interval of time.

| illumination time (min) | $J_{sc}$ (mA cm <sup>-2</sup> ) | $V_{oc}$ (mV) | FF   | $\eta$ (%) |
|-------------------------|---------------------------------|---------------|------|------------|
| 0                       | 15.5                            | 741.1         | 0.46 | 5.3        |
| 100                     | 12.9                            | 746.0         | 0.53 | 5.1        |
| 200                     | 12.5                            | 765.5         | 0.54 | 5.2        |
| 300                     | 11.5                            | 804.6         | 0.54 | 5.0        |
| 400                     | 11.0                            | 802.1         | 0.52 | 4.6        |
| 500                     | 10.9                            | 785.0         | 0.51 | 4.3        |
